# Supplementary material for: Genetic Control of Vulval Development in Caenorhabditis briggsae
Source: PubMed Central journal article supplement (PMC3516484; doi:10.1534/g3.112.004598), 2012-12-01
Supplement: supp_2.12.1625_004598SI.pdf [file supp_2.12.1625_004598SI.pdf]

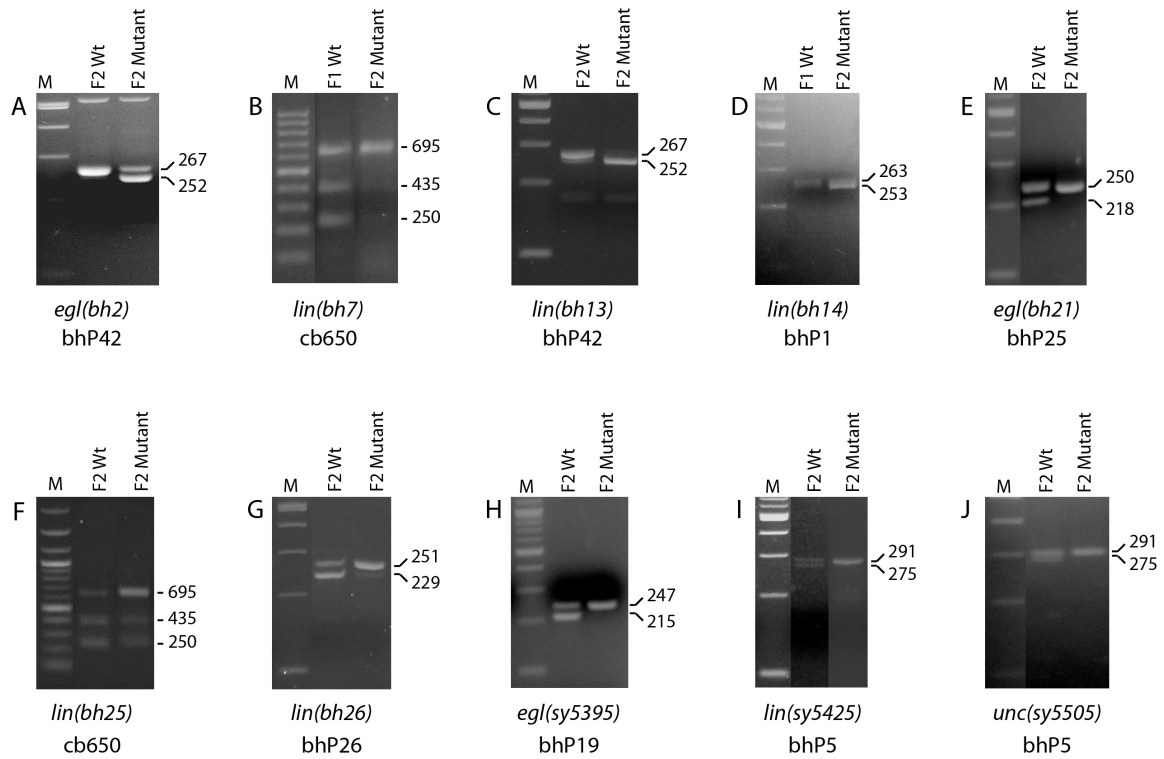

**Figure S1** Mutation mapping using indel and snip-SNP polymorphisms. The images show DNA bands on 4% (for indels) and 1% (for snip-SNPs) agarose gels. The polymorphisms have been previously described (KOBOLDT *et al.* 2010). See Materials and Methods and Table 3 for details. M: DNA molecular weight marker, F1 Wt: DNA from F1 heterozygous animals, F2 Wt: DNA from phenotypically wild type pool of F2 animals, F2 Mutant: DNA from phenotypically mutant pool of F2 animals.

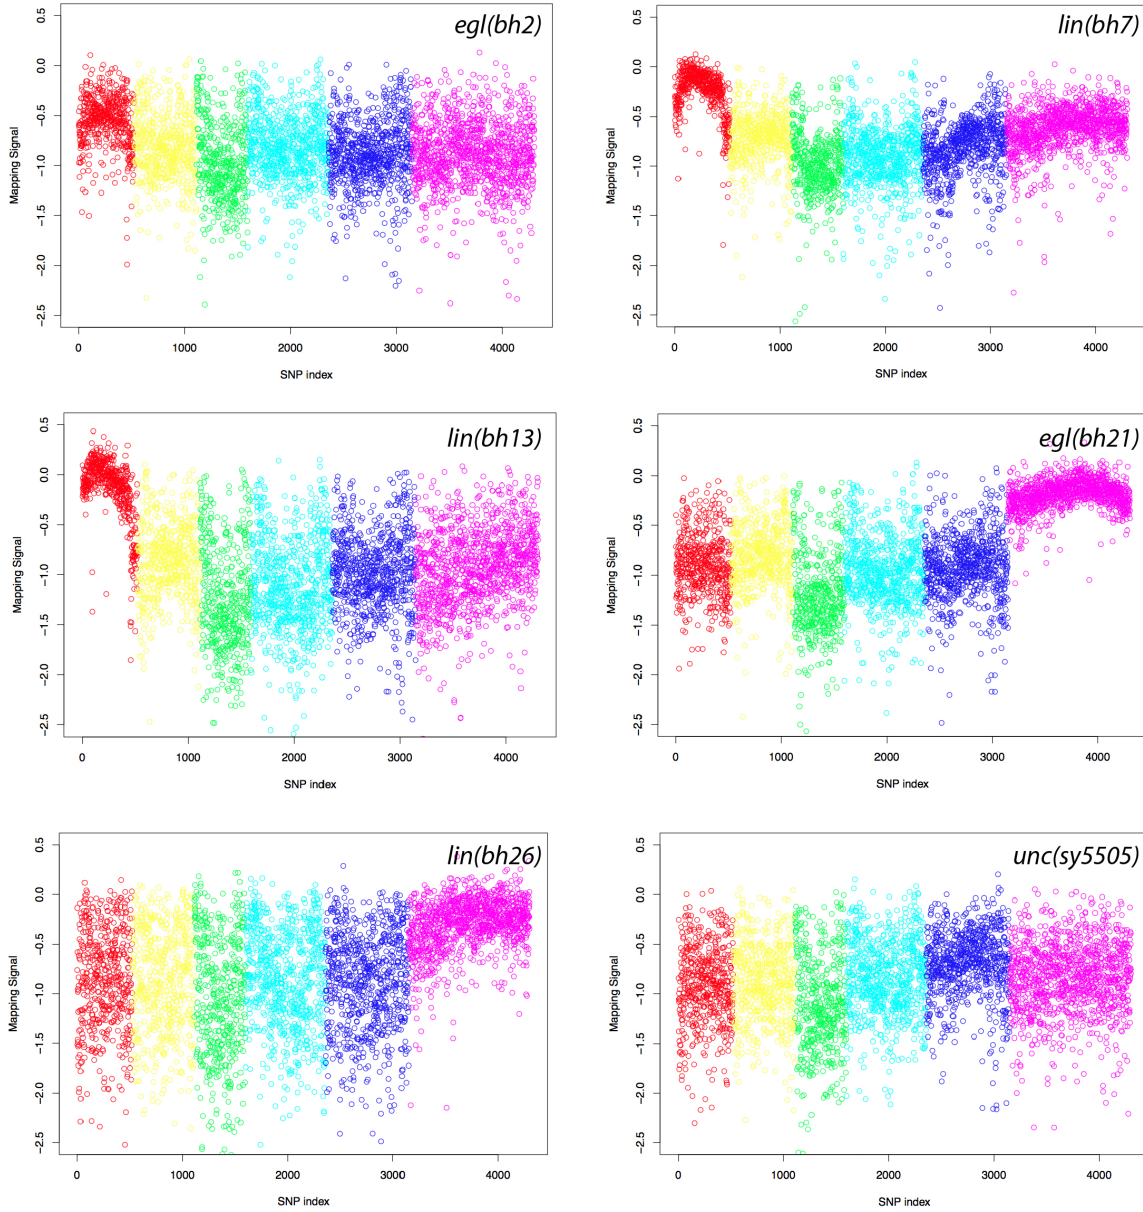

**Figure S2** Mutation mapping using SNP-chip. Each tiny colored circle represents the mapping signal for a single SNP. Chromosomes are color coded (starting from 1 to 5 and X, in that order). See Materials and Methods and Zhao *et al.* study (ZHAO *et al.* 2010) for details.

*Cbr-lin-11* cDNA sequence (1239 bp)

```

1  ATGCATTCTT  CTTCGTCCAT  CATCACCACC  CTGGAAGAAG  AAGAGAAGAA  GCCTCCTGCT
61  CATCTTCATC  AATATCATCA  TCATCTTCAT  CAACAGTCAG  TAGAAGACGT  CGGAAGTGCC
121  ACCTCATCAG  CCACGCTGCT  TCTTCTGGAT  ACTTCCGCTG  CCACGTGGAT  GATGCCGTCC
181  TCGACGACGC  ACCCTCAAAT  CTCCGAGATA  AGCGGAAATG  AATGCGCTGC  ATGTGCACAG
241  CCTATTCTTG  ACAGATATGT  ATTCACCGTT  CTTGGCAAAT  GTTGGCATCA  ATCATGTCTC
301  CGATGTTGCG  ATTGTCGAGC  TCCAATGTCG  ATGACTTGTT  TCAGTAAAGA  TGGCCTGATA
361  TTGTGTAATA  CAGACTATTC  AAGAAGGTAC  GGTCATCGAT  GCGCTGGATG  TGATGGAAAA
421  CTGGAAAAAG  AGGATTTAGT  AAGGAGAGCA  AGAGACAAAG  TATTTTCATAT  TCGATGTTTT
481  CAATGTTTCA  TATGTCAAAG  GCTCTTGGAT  ACGGGTGATC  AGCTTTTATAT  CATGGAGGGA
541  AATCGATTCA  TGTGTCAAAA  TGATTTTCAA  ACGGCTACCA  AAACATCGAC  TCCAACATCA
601  ATGCACCGTC  CAATATCCAA  TGGATCCGAA  TGTAATTCCG  ATATCGAGGA  AGATAACGTG
661  GATGCTTG TG  ACGAGGGTGG  TCTTGACGAC  GTTGATGGTG  ACTGTGGAAA  GGATAACTCT
721  GATGACTCAA  ACTCTGCAAA  ACGGCGGGGT  CCTCGAACAA  CAATCAAAGC  TAAACAGCTT
781  GAAACATTGA  AAAATGCATT  CGCTGCGACC  CCGAAACCAA  CTCGACACAT  CCGTGAACAA
841  CTTGCTGCCG  AGACAGGGCT  GAACATGAGA  GTCATTGAGG  TGTGGTTCCA  AAATCGACGA
901  AGCAAGGAAC  GTCGAATGAA  ACAGCTTCGA  TACGGTGGAT  ATCGTCAATC  CAGAAGACAA
961  CGTCGAGAGG  ATATCGTTGA  TATGTTTCCG  AATGACCAAC  AGTTCTACCC  TCCACCACCT
1021  CCATCAAACG  TTCAATTCTT  CTGTGACCCA  TATGGAAGTC  CTCCAAATAA  CGGAGAGTCG
1081  ATGCAAATTC  CATACAATT  CACAGTACCT  CCGGAGACTA  TGAATATGGT  GCCAGAACCA
1141  TATGCCGAAT  CATCGTCAAC  ACCACCAGAG  TTCAATGAAG  ATGCATTAC  ATGCATTTAT
1201  TCCACTGATG  TCGGAAAACC  AACTCCAGTT  TCATGGTAG

```

|      |            |               |
|------|------------|---------------|
| Exon | 1: 254 bp  | (1 - 254)     |
|      | 2: 129 bp  | (255 - 383)   |
|      | 3: 139 bp  | (384 - 522)   |
|      | 4: 91 bp   | (523 - 613)   |
|      | 5: 62 bp   | (614 - 675)   |
|      | 6: 102 bp  | (676 - 777)   |
|      | 7: 102 bp  | (778 - 879)   |
|      | 8: 115 bp  | (880 - 994)   |
|      | 9: 141 bp  | (995 - 1135)  |
|      | 10: 104 bp | (1136 - 1239) |

**Figure S3** *Cbr-lin-11* cDNA sequence. The positions of exon-intron boundaries are marked.

**Table S1 List of PCR and sequencing primers used in this study.**

| <b>Oligo</b>     | <b>Sequence (5' to 3')</b>      |
|------------------|---------------------------------|
| GL380            | GCTTCCCAATTCTCTGAGACGTCACA      |
| GL381            | GCCAAATTGCACAATTCAGTTCAG        |
| GL382            | GTCCCGTTGAGACACACTTACATTG       |
| GL383            | CTCTGCTAGCTCCGACCACATTTT        |
| GL384            | AGGCTACTGTAGTTCTCATTTTAGGACCTA  |
| GL385            | GGTCAAAGCTAGAAGCCTATTAGAGCG     |
| GL389            | TTACGGTATTGGACGCCTAGGTAACC      |
| GL390            | GAGAAGTTCACACCTGCTGAGCTAC       |
| GL391            | GCAACAATGGAGCATCTACAGTAAGATCCC  |
| GL392            | AACAGGATACTGTGGTCTGCTCCAATC     |
| GL793            | AGCTTCACATCTTGGTTCG             |
| GL795            | AAGAACTCTGGATGGGCTC             |
| GL800            | CGGGAAGTTTGTGGAACG              |
| GL801            | GACAGAGTGACGGAACAGC             |
| GL802            | GGCTCTCCTAATACATTCACG           |
| GL806            | TCCGAATAAGCGTAGGAGAC            |
| GL807            | AGCAGTCACTGTCCTTCC              |
| GL808            | AGATCCGTGTTGTCCAAGG             |
| GL809            | AGCTTCCTGTCTACGGTC              |
| GL810            | GAGGTAGCGCCCAATTTATG            |
| GL812            | CCTCTATTCCAGCCAGAAACC           |
| cb-lin-11-up-1   | CCATGCATTCTTCTCGTCCATCATCAC     |
| cb-lin-11-up-2   | TCTTCTGCAGTTCGGTTCTCGTTCATTTTCC |
| cb-lin-11-up-4   | GGAAGTCTCCAATAACGGAGAG          |
| cb-lin-11-up-5   | GTCTTGACGACGTTGATGGTGACTGTG     |
| cb-lin-11-up-6   | GGAAATGAATGCGCTGCATGTGCAC       |
| cb-lin-11-up-7   | GATTCTACCATCTTTCCACGCTGTAG      |
| cb-lin-11-up-8   | CTGGCTCTCCTCATCTAACTG           |
| cb-lin-11-up-9   | CTGGTCAATCGTACAGGGTTC           |
| cb-lin-11-down-1 | CCCTGCAGTAAAAGTGGAGTTGGTTTTCC   |
| cb-lin-11-down-2 | GTGATGATGGACGAAGAAGAATGCATG     |
| cb-lin-11-down-5 | CTGAAAATGAAATGACTGGTCCGAGGG     |
| cb-lin-11-down-7 | GAACCCTGTGTCTCCTCTACTTC         |
| cb-lin-11-down-8 | GATAACTGACTCCAATAGACGTAGGC      |
