# Supplementary material for: Genetic Control of Vulval Development in Caenorhabditis briggsae
Source: PubMed Central journal article supplement (PMC3516484; doi:10.1534/g3.112.004598), 2012-12-01
Supplement: supp_2.12.1625_FigureS1.pdf [file supp_2.12.1625_FigureS1.pdf]

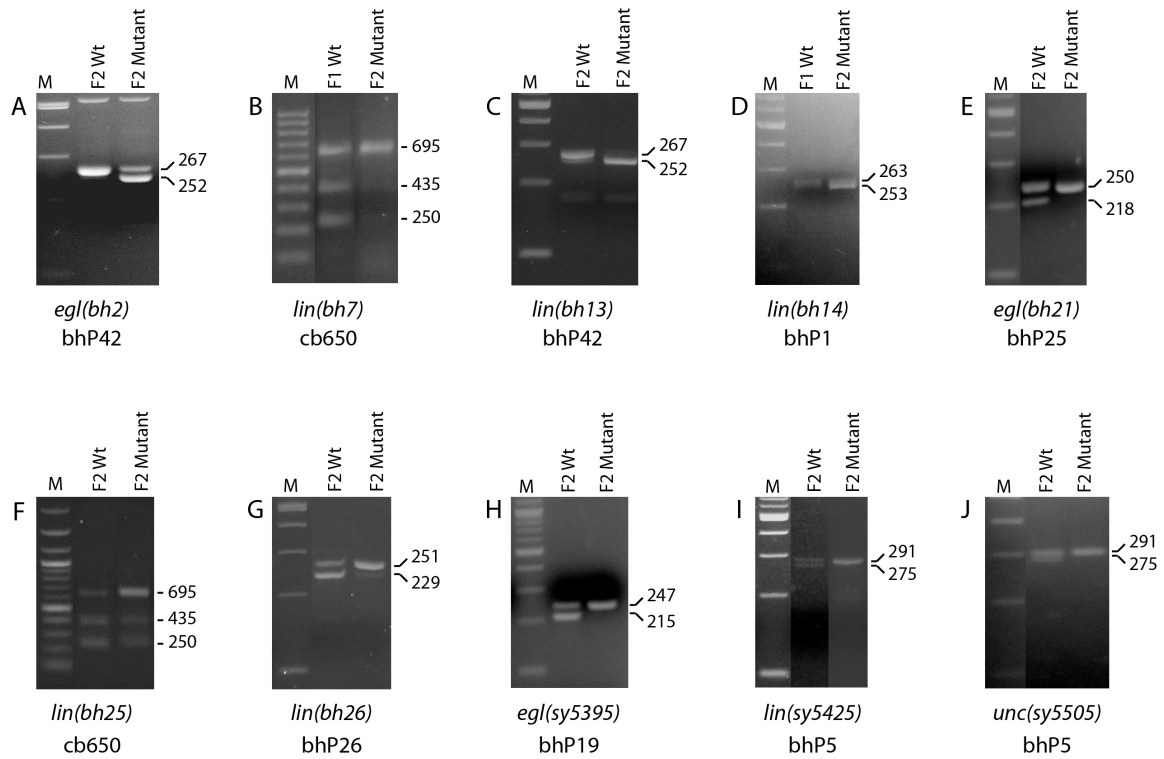

**Figure S1** Mutation mapping using indel and snip-SNP polymorphisms. The images show DNA bands on 4% (for indels) and 1% (for snip-SNPs) agarose gels. The polymorphisms have been previously described (KOBOLDT *et al.* 2010). See Materials and Methods and Table 3 for details. M: DNA molecular weight marker, F1 Wt: DNA from F1 heterozygous animals, F2 Wt: DNA from phenotypically wild type pool of F2 animals, F2 Mutant: DNA from phenotypically mutant pool of F2 animals.
