# Supplementary material for: Genetic Control of Vulval Development in Caenorhabditis briggsae
Source: PubMed Central journal article supplement (PMC3516484; doi:10.1534/g3.112.004598), 2012-12-01
Supplement: supp_2.12.1625_FigureS2.pdf [file supp_2.12.1625_FigureS2.pdf]

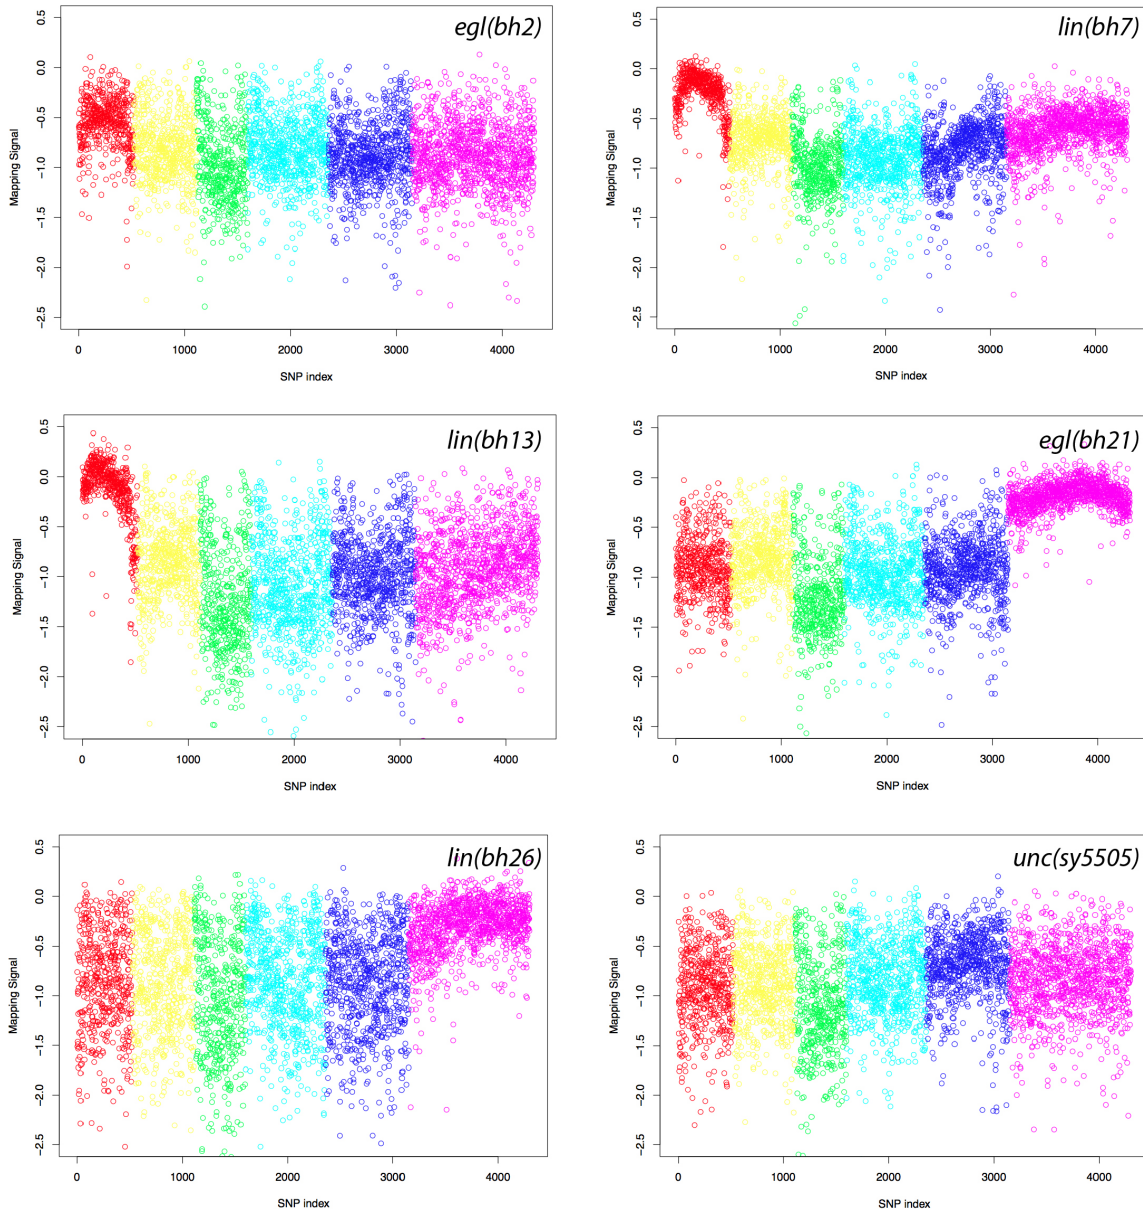

**Figure S2** Mutation mapping using SNP-chip. Each tiny colored circle represents the mapping signal for a single SNP. Chromosomes are color coded (starting from 1 to 5 and X, in that order). See Materials and Methods and Zhao *et al.* study (ZHAO *et al.* 2010) for details.
