# Supplementary material for: Genetic Control of Vulval Development in Caenorhabditis briggsae
Source: PubMed Central journal article supplement (PMC3516484; doi:10.1534/g3.112.004598), 2012-12-01
Supplement: supp_2.12.1625_TableS1.pdf [file supp_2.12.1625_TableS1.pdf]

**Table S1 List of PCR and sequencing primers used in this study.**

| <b>Oligo</b>     | <b>Sequence (5' to 3')</b>     |
|------------------|--------------------------------|
| GL380            | GCTTCCCAATTCTCTGAGACGTCACA     |
| GL381            | GCCAAATTGCACAATTCAGTTCAG       |
| GL382            | GTCCCGTTGAGACACACTTACATTG      |
| GL383            | CTCTGCTAGCTCCGACCACATTTT       |
| GL384            | AGGCTACTGTAGTTCTCATTTTAGGACCTA |
| GL385            | GGTCAAAGCTAGAAGCCTATTAGAGCG    |
| GL389            | TTACGGTATTGGACGCCTAGGTAACC     |
| GL390            | GAGAAGTTCACACCTGCTGAGCTAC      |
| GL391            | GCAACAATGGAGCATCTACAGTAAGATCCC |
| GL392            | AACAGGATACTGTGGTCTGCTCCAATC    |
| GL793            | AGCTTCACATCTTGGTTCG            |
| GL795            | AAGAACTCTGGATGGGCTC            |
| GL800            | CGGGAAGTTTGTGGAACG             |
| GL801            | GACAGAGTGACGGAACAGC            |
| GL802            | GGCTCTCCTAATACATTCACG          |
| GL806            | TCCGAATAAGCGTAGGAGAC           |
| GL807            | AGCAGTCACTGTCCTTCC             |
| GL808            | AGATCCGTGTTGTCCAAGG            |
| GL809            | AGCTTCCTGTCTACGGTC             |
| GL810            | GAGGTAGCGCCCAATTTATG           |
| GL812            | CCTCTATTCCAGCCAGAAACC          |
| cb-lin-11-up-1   | CCATGCATTCTTCTCGTCCATCATCAC    |
| cb-lin-11-up-2   | TCTTCTGCAGTTCGGTTCATTTTCC      |
| cb-lin-11-up-4   | GGAAGTCTCCAATAACGGAGAG         |
| cb-lin-11-up-5   | GTCTTGACGACGTTGATGGTGACTGTG    |
| cb-lin-11-up-6   | GGAAATGAATGCGCTGCATGTGCAC      |
| cb-lin-11-up-7   | GATTCTACCATCTTTCCACGCTGTAG     |
| cb-lin-11-up-8   | CTGGCTCTCCTCATCTAACTG          |
| cb-lin-11-up-9   | CTGGTCAATCGTACAGGGTTC          |
| cb-lin-11-down-1 | CCCTGCAGTAAAAGTGGAGTTGGTTTTCC  |
| cb-lin-11-down-2 | GTGATGATGGACGAAGAAGAATGCATG    |
| cb-lin-11-down-5 | CTGAAAATGAAATGACTGGTCCGAGGG    |
| cb-lin-11-down-7 | GAACCCTGTGTCTCCTCTACTTC        |
| cb-lin-11-down-8 | GATAACTGACTCCAATAGACGTAGGC     |
